# Supplementary material for: Ischemic Heart Disease in Workers at Mayak PA: Latency of Incidence Risk after Radiation Exposure
Source: PubMed Central journal article supplement (PMC4020749; doi:10.1371/journal.pone.0096309), 2014-05-14
Supplement: pone.0096309.s002.pdf [file pone.0096309.s002.pdf]

| Lag-time  | 0 years           | 10 years          | 20 years          | 30 years          |
|-----------|-------------------|-------------------|-------------------|-------------------|
| Incidence | -0.01(-0.05;0.05) | -0.02(-0.07;0.09) | -0.03(-0.10;0.17) | -0.16(-0.16;0.09) |
| Mortality | 0.07(-0.03;0.20)  | 0.08(-0.03;0.26)  | 0.13(-0.04;0.38)  | 0.27(-0.03;0.74)  |

**Table S1. Excess relative risk per dose [ $\text{Gy}^{-1}$ ] for internal radiation with 95% confidence levels for various lag-times.** To correct for external radiation, an LNT model with the same lag-time has been applied. The confidence intervals for incidence are bound from below by the requirement of a positive hazard,  $ERR_{\text{int}} > -1$ , for the worker with highest dose.
